# Supplementary material for: Thermo-responsive triblock copolymer micelles containing PEG6000 for either water-soluble or water-insoluble drug sustained release and treatment
Source: Royal Society of Chemistry journal article supplement (doi:10.1039/c5ra03105b), 2015-01-01
Supplement: c5ra03105b1.pdf [file c5ra03105b1.pdf]

**Supplementary information**

**Thermo-responsive triblock copolymer micelles containing  
PEG<sub>6000</sub> for either water-soluble or water-insoluble drug  
sustained release and treatment**

Jun Fu,<sup>b</sup> Xinyi Lv<sup>b</sup> and Liyan Qiu<sup>\*a</sup>

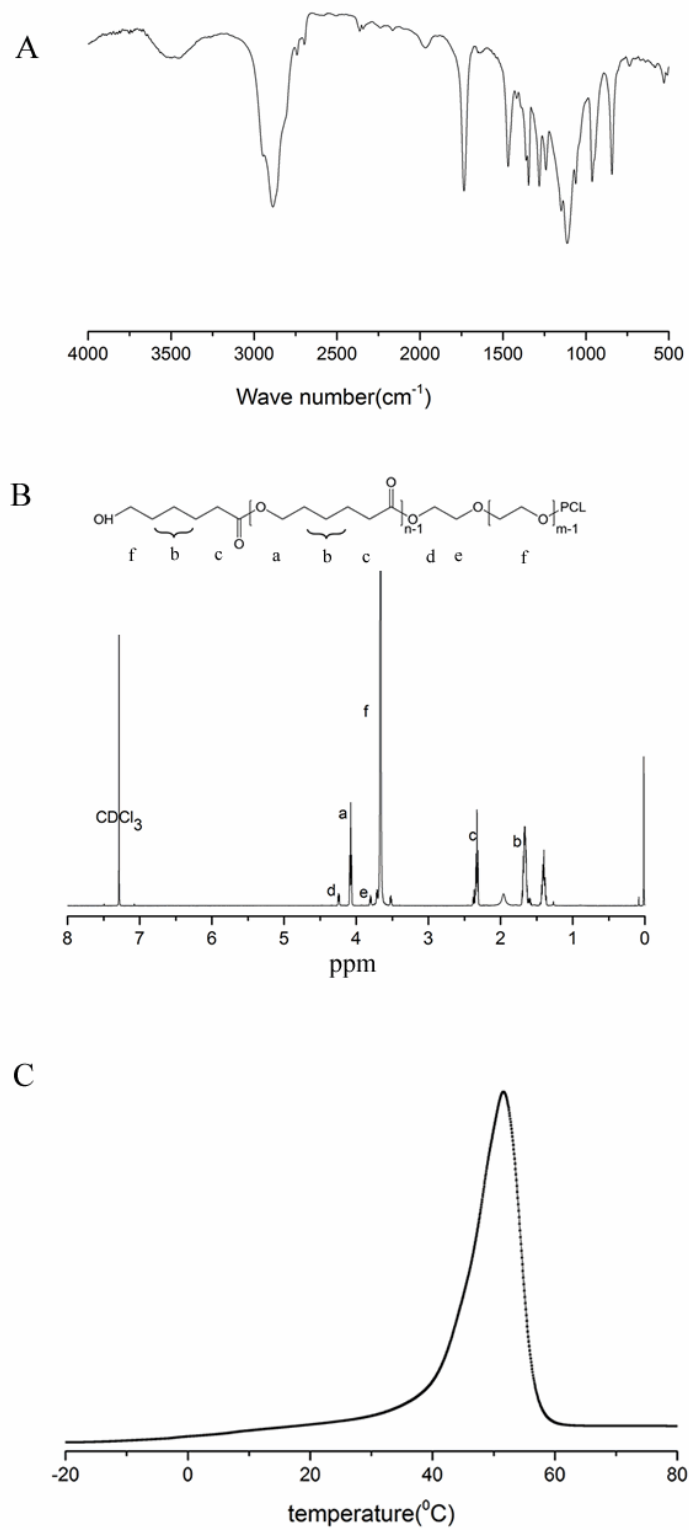

**Supplementary Fig. 1** Physico-chemical characteristic of PCEC<sub>1000-6000-1000</sub> copolymer. A. FT-IR spectra; B. <sup>1</sup>H-NMR spectra; C. The DSC curve.

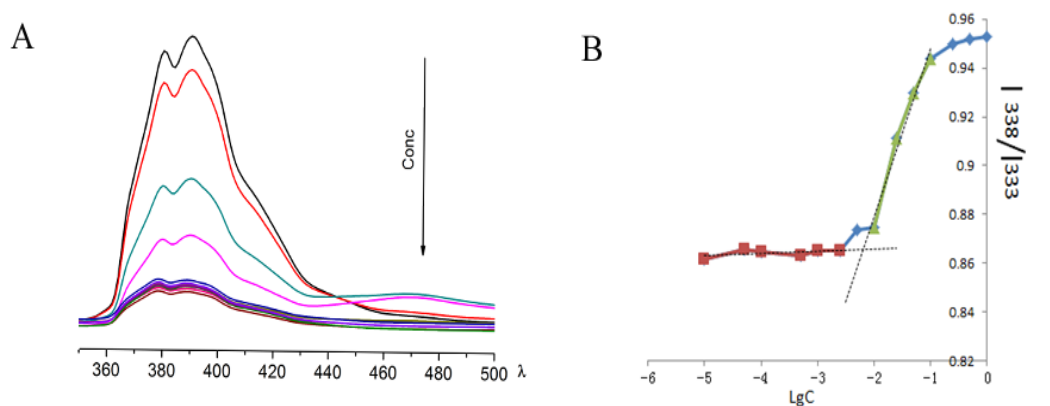

**Supplementary Fig. 2** The CMC measurement of PCEC<sub>1000-6000-1000</sub>. (A) The fluorescence emission spectrum of Pyrene in different concentration of copolymer solution; (B) The ratio of fluorescence intensity at 338 and 333 nm in solution.

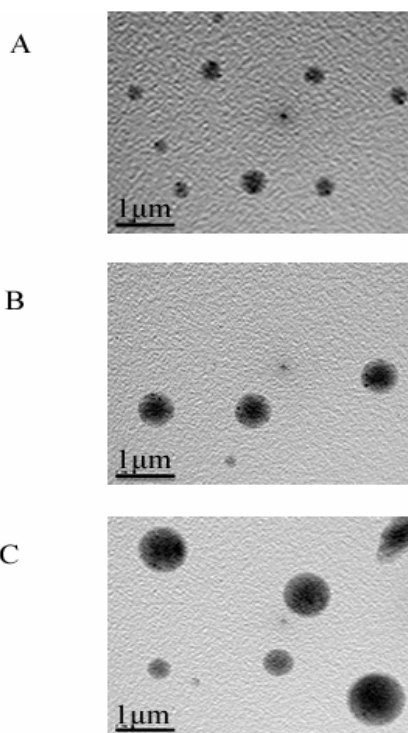

**Supplementary Fig. 3** The TEM images of three copolymers. (A) PCEC<sub>1000-6000-1000</sub>; (B) PCEC<sub>1250-6000-1250</sub>; (C) PCEC<sub>1350-6000-1350</sub>.

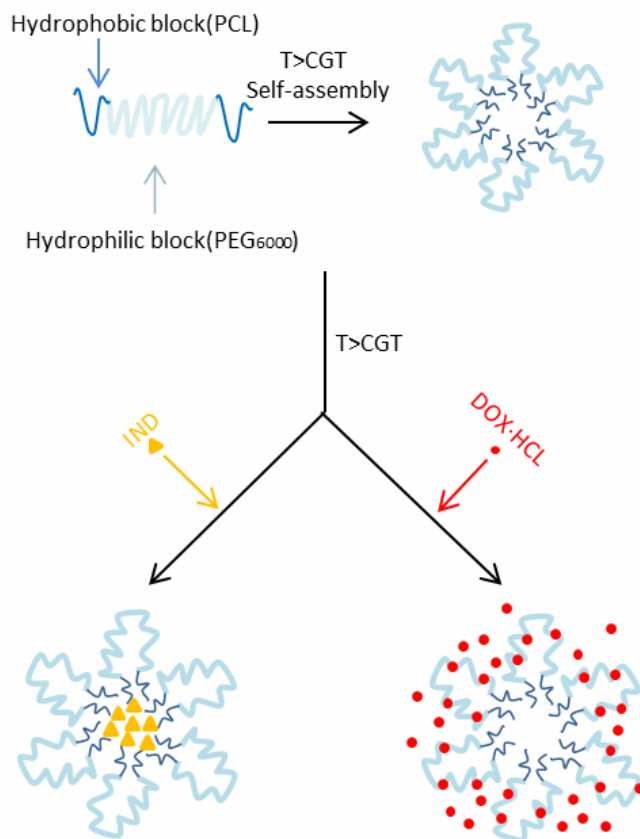

**Supplementary Fig. 4** The drug-loading mechanism of PCEC.

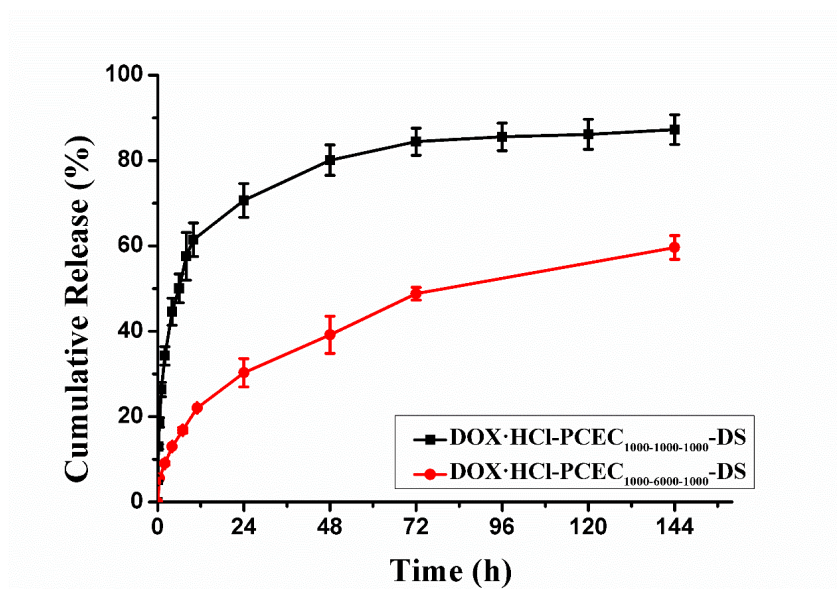

**Supplementary Fig. 5** Water-soluble DOX·HCL release from PCEC<sub>1000-1000-1000</sub> and PCEC<sub>1000-6000-1000</sub> hydrogels.
